# Supplementary material
Source: publisher site journal article supplement (https://www.dovepress.com/article/388330)
Supplement: Supplementary file 1 [file get_supplementary_file.php]

**Supplementary Table 1** Clinical characteristics associated with DPN of study participants according to VFA quartiles

| **Characteristics** | **Q1** | **Q2** | **Q3** | **Q4** | **P** |
| --- | --- | --- | --- | --- | --- |
| 5-54 | 55-79 | 80–107 | 108-399 |
| n=632 | n=614 | n=626 | n=626 |
| Male/Female | 337/295 | 268/346 | 319/307 | 397/229 | <0.001 |
| Age (years) | 52.41±11.78 | 56.88±10.64 | 56.75±10.95 | 57.35±10.89 | <0.001 |
| BMI (kg/m2) | 21.7±2.3 | 23.7±2.3 | 25.5±2.4 | 28.0±3.2 | <0.001 |
| VFA(cm2) | 31.97±16.38 | 67.72± 6.92 | 92.43±7.85 | 138.63± 36.52 | <0.001 |
| Diabetic duration (years) | 7.85±5.92 | 8.67± 6.09 | 8.46±6.45 | 9.08± 6.83 | 0.065 |
| FBG (mmol/L) | 9.91±3.71 | 9.40± 3.14 | 9.61±3.16 | 9.91± 3.43 | 0.049 |
| 2hPBG (mmol/L) | 14.98±5.21 | 14.67± 4.83 | 14.71±4.65 | 15.01± 4.70 | 0.483 |
| HbA1c (%) | 10.50±2.91 | 9.60±2.53 | 9.66±2.46 | 9.50±2.11 | <0.001 |
| FCP (ng/mL) | 1.20±1.16 | 1.81±1.35 | 2.04±1.46 | 2.35±1.69 | <0.001 |
| HOMA-IR | 2.83±1.63 | 3.37±1.64 | 3.65±1.88 | 4.14±2.32 | <0.001 |
| TyG index | 9.20±0.73 | 9.47±0.74 | 9.62±0.74 | 9.79±0.78 | <0.001 |
| SBP (mmHg) | 129.63±21.53 | 134.43±20.31 | 137.13±20.04 | 140.33±19.65 | <0.001 |
| DBP (mmHg) | 76.37±11.79 | 78.61±10.69 | 80.28±10.84 | 82.51±10.84 | <0.001 |
| PP (mmHg) | 53.27±13.91 | 55.82±14.13 | 56.84±14.14 | 57.82±14.72 | <0.001 |
| TC (mmol/L) | 4.73±1.43 | 4.85± 1.43 | 4.79±1.30 | 4.89± 3.24 | 0.230 |
| TG (mmol/L) | 1.63±1.30 | 2.29± 2.25 | 2.66±2.54 | 3.07± 2.99 | <0.001 |
| HDL-C (mmol/L) | 1.29±0.45 | 1.16± 0.31 | 1.11±0.29 | 1.05± 0.30 | <0.001 |
| LDL-C (mmol/L) | 2.87±1.14 | 2.87± 1.07 | 2.82±1.03 | 2.76± 1.06 | 0.405 |
| WBC (∗109/L) | 6.89±2.57 | 6.73±2.06 | 6.97±2.30 | 7.07±2.00 | 0.001 |
| RBC (∗1012/L) | 4.43±0.67 | 4.56±0.63 | 4.66±0.65 | 4.69±0.60 | <0.001 |
| Hb (g/L) | 131.29±21.04 | 135.57±18.65 | 138.33±17.97 | 141.14±19.34 | <0.001 |
| TBIL (μmol/L) | 12.30±6.60 | 13.09±6.59 | 13.33±5.95 | 13.79±6.27 | 0.001 |
| GGT (U/L) | 45.98±7.12 | 38.74±2.75 | 40.45±2.05 | 55.54±4.40 | <0.001 |
| Serum albumin (g/L) | 42.42±5.62 | 43.92±4.26 | 44.30±4.96 | 44.44±4.12 | <0.001 |
| Serum UA (μmol/L) | 308.03±4.84 | 322.06±3.81 | 348.89±7.92 | 408.40±29.45 | <0.001 |
| Urine ACR (mg/g) | 331.55±48.46 | 208.27± 33.29 | 186.55±25.77 | 223.75± 30.93 | 0.001 |
| Serum Cr (μmol/L) | 67.75±46.16 | 65.14±39.65 | 70.06±48.44 | 71.97±31.69 | <0.001 |
| eGFR (mL/min/1.73m2) | 102.30±25.14 | 98.64±21.53 | 96.46±23.00 | 94.30±23.48 | <0.001 |
| AC | 2.99±2.10 | 3.43±1.82 | 3.52±1.76 | 3.90±4.09 | <0.001 |
| AIP | 0.10±0.76 | 0.49±0.75 | 0.67±0.77 | 0.85±0.76 | <0.001 |
| ABI | 1.10±0.09 | 1.10±0.11 | 1.10±0.10 | 1.10±0.10 | 0.894 |
| Microvascular complications |  |  |  |  |  |
| DN (n, %) | 216 (34.18%) | 178 (28.99%) | 213 (34.03%) | 241 (38.50%) | 0.005 |
| DR (n, %) | 147 (23.26%) | 112 (18.24%) | 120 (19.17%) | 106 (16.93%) | 0.030 |
| Macrovascular complications |  |  |  |  |  |
| Hypertension (n, %) | 131 (20.73%) | 190 (30.94%) | 256 (40.89%) | 319 (50.96%) | <0.001 |
| CHD (n, %) | 16 (2.53%) | 38 (6.19%) | 27 (4.31%) | 45 (7.19%) | 0.001 |
| Stroke (n, %) | 27 (4.27%) | 29 (4.72%) | 31 (4.95%) | 33 (5.27%) | 0.863 |
| DFU (n, %) | 13 (2.06%) | 11 (1.79%) | 13 (2.08%) | 8 (1.28%) | 0.684 |
| PAD (n, %) | 11 (1.74%) | 26 (4.23%) | 18 (2.88%) | 22 (3.51%) | 0.072 |
| Hypoglycemic medication |  |  |  |  |  |
| Metformin (n, %) | 277 (43.83%) | 333 (54.23%) | 312 (49.84%) | 340 (54.31%) | <0.001 |
| Sulfonylurea (n, %) | 166 (26.27%) | 189 (30.78%) | 179 (28.59%) | 160 (25.56%) | 0.150 |
| Alpha-glucosidase inhibitor (n, %) | 67 (10.60%) | 81 (13.19%) | 66 (10.54%) | 72 (11.50%) | 0.438 |
| DPP-4 (n, %) | 26 (4.11%) | 24 (3.91%) | 18 (2.88%) | 25 (3.99%) | 0.649 |
| SGLT-2 (n, %) | 5 (0.79%) | 9 (1.47%) | 6 (0.96%) | 6 (0.96%) | 0.675 |
| Other oral agents (n, %) | 124 (19.62%) | 102 (16.61%) | 122 (19.49%) | 104 (16.61%) | 0.285 |
| Insulin (n, %) | 222 (35.13%) | 176 (28.66%) | 199 (31.79%) | 234 (37.38%) | 0.007 |
| Antihypertensive drugs |  |  |  |  |  |
| ACEI/ARB (n, %) | 32 (5.06%) | 46 (7.49%) | 95 (15.18%) | 101 (16.13%) | <0.001 |
| Alcium antagonist (n, %) | 40 (6.33%) | 62 (10.10%) | 87 (13.90%) | 140 (22.36%) | <0.001 |
| Others (n, %) | 8 (1.27%) | 12 (1.95%) | 18 (2.88%) | 25 (3.99%) | 0.013 |
| Antihyperlipidemic drugs (n, %) | 20 (3.16%) | 25 (4.07%) | 33 (5.27%) | 47 (7.51%) | 0.003 |
| Antiplatelet drugs (n, %) | 3 (0.47%) | 11 (1.79%) | 7 (1.12%) | 7 (1.12%) | 0.182 |
| Smoking (n, %) | 143 (22.63%) | 111 (18.09%) | 114 (18.21%) | 169 (27.00%) | <0.001 |
| Fresh vegetable intake |  |  |  |  |  |
| ≥ 600 g/d (n, %) | 89 (14.08%) | 73 (11.89%) | 95 (15.18%) | 116 (18.53%) | 0.010 |
| <600 g/d (n, %) | 543 (85.92%) | 541 (88.11%) | 531 (84.82%) | 510 (81.47%) |
| Fresh fruit intake |  |  |  |  |  |
| ≥ 200 g/d (n, %) | 132 (20.89%) | 127 (20.68%) | 163 (26.04%) | 132 (21.09%) | 0.059 |
| <200 g/d (n, %) | 500 (79.11%) | 487 (79.32%) | 463 (73.96%) | 494 (78.91%) |
| Soy consumption |  |  |  |  |  |
| ≥ 100 g/d (n, %) | 75 (11.87%) | 74 (12.05%) | 99 (15.81%) | 67 (10.70%) | 0.033 |
| <100 g/d (n, %) | 557 (88.13%) | 540 (87.95%) | 527 (84.19%) | 559 (89.30%) |
| Fish intake |  |  |  |  |  |
| ≥ two times/week (n, %) | 68 (10.76%) | 71 (11.56%) | 99 (15.81%) | 85 (13.58%) | 0.030 |
| ≤ one time/week (n, %) | 564 (89.24%) | 543 (88.44%) | 527 (84.19%) | 541 (86.42%) |
| SNCV(m/s) | 50.00±6.76 | 51.98 ±6.48 | 52.53 ±6.10 | 52.17±5.54 | <0.001 |
| SNAP(μV) | 10.78±6.77 | 13.47 ±7.83 | 13.80 ±7.77 | 14.20±7.42 | <0.001 |
| DPN (n,%) | 328 (51.90) | 214 (34.85) | 188 (30.03) | 170 (27.16) | <0.001 |
| Unilateral abnormality (n,%) | 129 (20.41) | 107 (17.43) | 78 (12.46) | 96 (15.34) | <0.001 |
| Bilateral abnormalities (n,%) | 199 (31.49) | 107(17.43) | 110 (17.57) | 74 (11.82) | <0.001 |
| Mild (n,%) | 166 (26.27) | 115 (18.73) | 106 (16.93) | 102 (16.30) | <0.001 |
| moderate to severe (n,%) | 162 (25.63) | 99 (16.12) | 82 (13.10) | 68 (10.86) | <0.001 |

Values are presented as mean± SD or number (percentages).

Q: quartile; SNCV: sural nerve conduction velocity; SNAP: sural nerve amplitude potential.
